# Supplementary material
Source: Springer Nature journal article supplement (https://www.springermedizin.de/resource/supplementary/12874_2012_917_MOESM7_ESM.pdf/9433150)
Supplement: MOESM7 [file 9433150]

What are the views, preferences and attitudes of employees to workplace  
smoking cessation or reduction interventions or strategies?

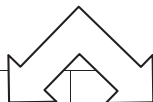

Systematically identified relevant ("best fit")  
publications of frameworks, conceptual models or  
theories using the BeHEMOTH approach

Systematically identified 15 relevant primary research  
studies with qualitative evidence using the SPIDER  
approach supplemented with other methods

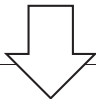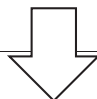

An a priori framework with 11 themes was generated  
from five identified publication(s) using thematic  
analysis

Data on study characteristics were extracted from 15  
included studies and the quality of the studies was  
appraised

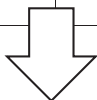

Findings and evidence from 15 included studies were coded against the a priori framework. All themes in the  
framework were supported by evidence from the included studies

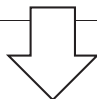

Six new themes were created through thematic analysis of evidence  
that could not be coded against the framework

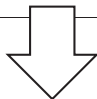

A new, context-specific framework was produced composed  
of both the a priori and the new themes

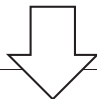

Evidence was revisited to explore relationships between themes in framework, thus creating a model

This synthesis and model was tested by exploring issues of dissonance and the impact of variables such as quality
